# Supplementary material for: Theoretical exploration of quaternary hexagonal MAB phases and two-dimensional derivatives
Source: Royal Society of Chemistry journal article supplement (doi:10.1039/d1nr02882k), 2021-01-01
Supplement: d1nr02882k1.pdf [file d1nr02882k1.pdf]

## Theoretical Exploration of Quaternary Hexagonal MAB Phases and Two-Dimensional Derivatives

Yufang Yao, Nanxi Miao, Yutong Gong, Junjie Wang\*,

State Key Laboratory of Solidification Processing, Northwestern Polytechnical University, Xi'an, Shaanxi 710072, People's Republic of China.

### Supporting Figures

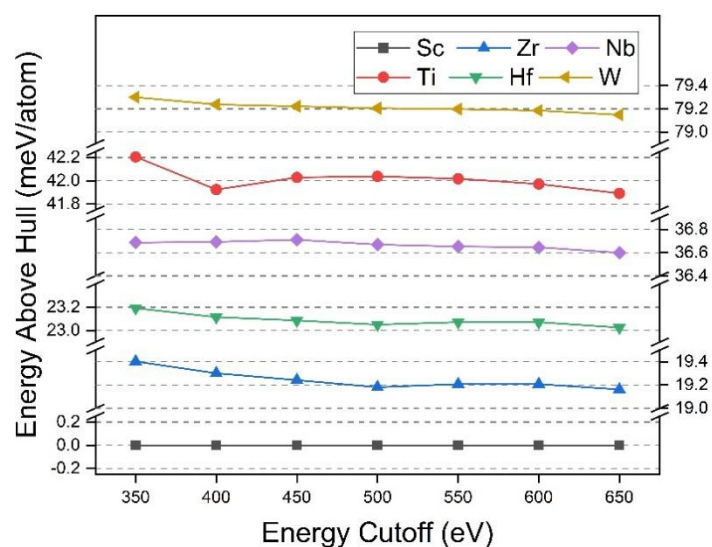

**Figure S1.** Convergence test of energy above convex hull of  $(\text{Mo}_{2/3}\text{M}''_{1/3})\text{GaB}_2$  ( $R\bar{3}m$ ) (where  $\text{M}'' = \text{Sc}, \text{Ti}, \text{Zr}, \text{Hf}, \text{Nb}, \text{W}$ ) as function of energy cutoff.

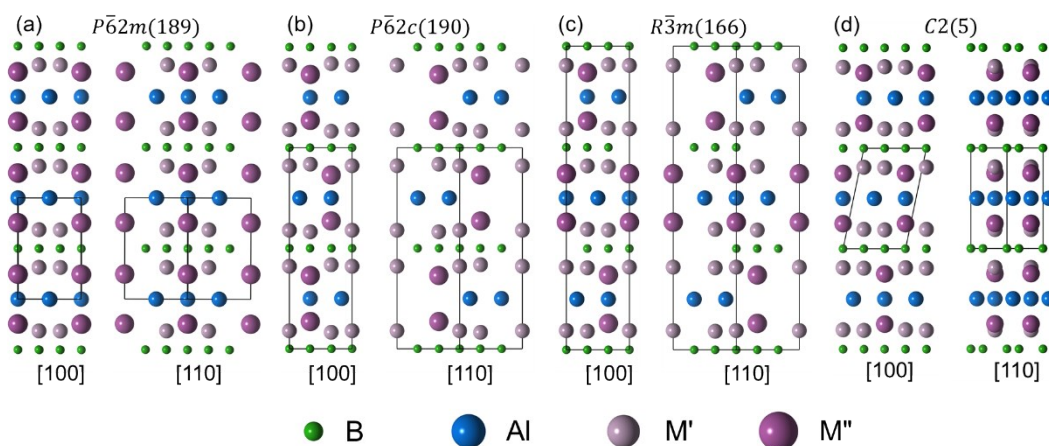

**Figure S2.** The crystal structure of predicted  $(\text{M}'_{2/3}\text{M}''_{1/3})_2\text{AlB}_2$  quaternary  $h$ -MAB phases, (a)  $P\bar{6}2m$  (189), (b)  $P\bar{6}2c$  (190), (c)  $R\bar{3}m$  (166) and (d)  $C2$  (5).

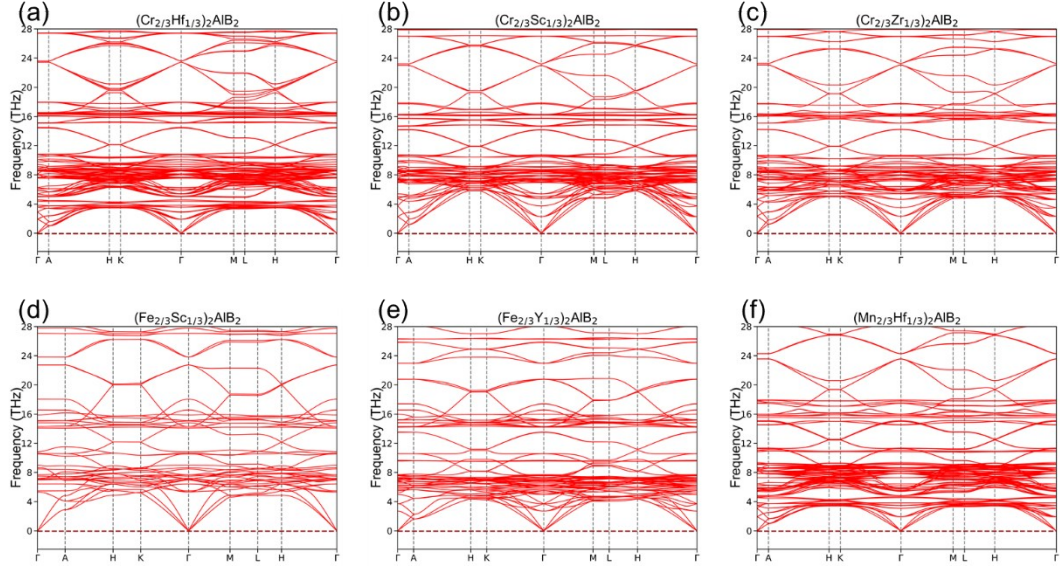

**Figure S3.** Phonon dispersion calculation for (a)  $(\text{Cr}_{2/3}\text{Sc}_{1/3})_2\text{AlB}_2$ , (b)  $(\text{Cr}_{2/3}\text{Zr}_{1/3})_2\text{AlB}_2$ , (c)  $(\text{Cr}_{2/3}\text{Hf}_{1/3})_2\text{AlB}_2$ , (d)  $(\text{Fe}_{2/3}\text{Sc}_{1/3})_2\text{AlB}_2$ , (e)  $(\text{Fe}_{2/3}\text{Y}_{1/3})_2\text{AlB}_2$ , (f)  $(\text{Mn}_{2/3}\text{Hf}_{1/3})_2\text{AlB}_2$ .

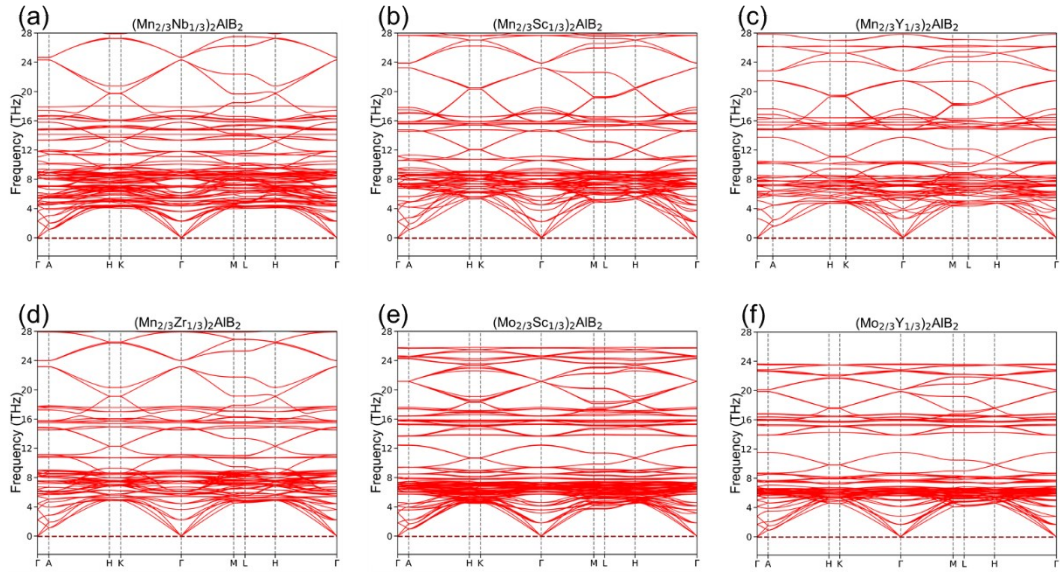

**Figure S4.** Phonon dispersion calculation for (a)  $(\text{Mn}_{2/3}\text{Nb}_{1/3})_2\text{AlB}_2$ , (b)  $(\text{Mn}_{2/3}\text{Sc}_{1/3})_2\text{AlB}_2$ , (c)  $(\text{Mn}_{2/3}\text{Y}_{1/3})_2\text{AlB}_2$ , (d)  $(\text{Mn}_{2/3}\text{Zr}_{1/3})_2\text{AlB}_2$ , (e)  $(\text{Mo}_{2/3}\text{Sc}_{1/3})_2\text{AlB}_2$ , (f)  $(\text{Mo}_{2/3}\text{Y}_{1/3})_2\text{AlB}_2$ .

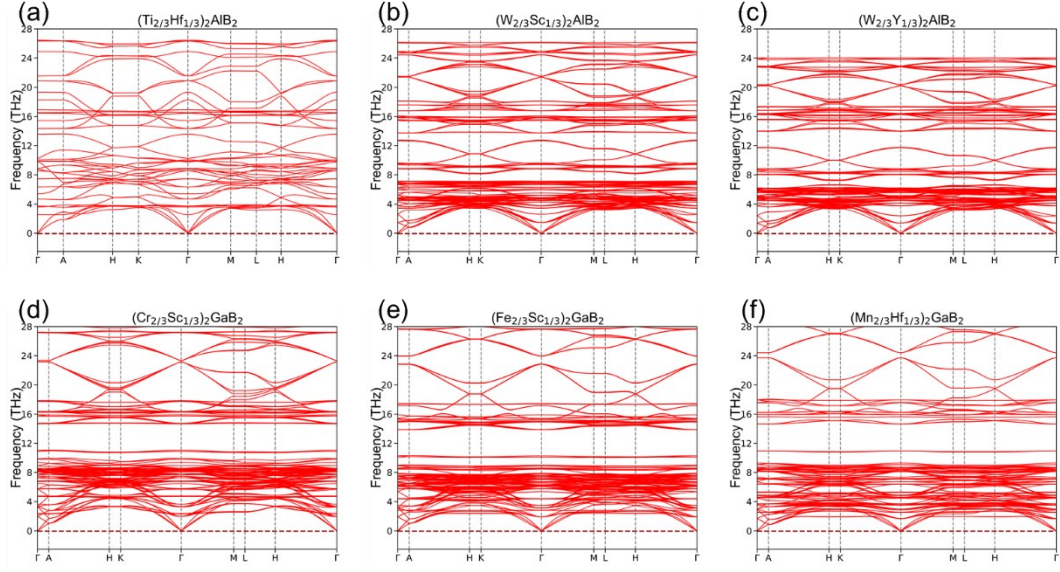

**Figure S5.** Phonon dispersion calculation for (a)  $(\text{Ti}_{2/3}\text{Hf}_{1/3})_2\text{AlB}_2$ , (b)  $(\text{W}_{2/3}\text{Sc}_{1/3})_2\text{AlB}_2$ , (c)  $(\text{W}_{2/3}\text{Y}_{1/3})_2\text{AlB}_2$ , (d)  $(\text{Cr}_{2/3}\text{Sc}_{1/3})_2\text{GaB}_2$ , (e)  $(\text{Fe}_{2/3}\text{Sc}_{1/3})_2\text{GaB}_2$ , (f)  $(\text{Mn}_{2/3}\text{Hf}_{1/3})_2\text{GaB}_2$ .

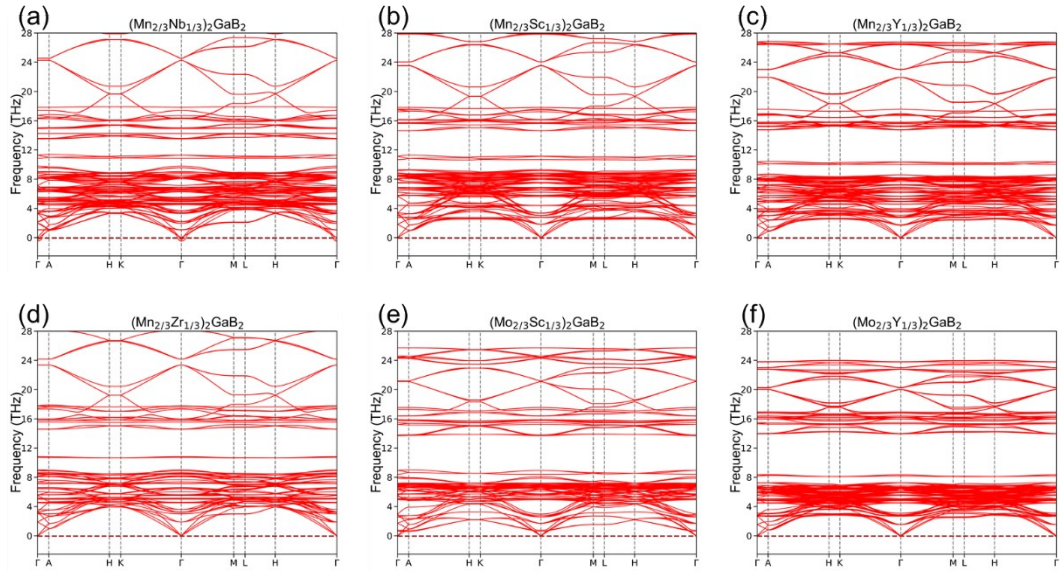

**Figure S6.** Phonon dispersion calculation for (a)  $(\text{Mn}_{2/3}\text{Nb}_{1/3})_2\text{GaB}_2$ , (b)  $(\text{Mn}_{2/3}\text{Sc}_{1/3})_2\text{GaB}_2$ , (c)  $(\text{Mn}_{2/3}\text{Y}_{1/3})_2\text{GaB}_2$ , (d)  $(\text{Mn}_{2/3}\text{Zr}_{1/3})_2\text{GaB}_2$ , (e)  $(\text{Mo}_{2/3}\text{Sc}_{1/3})_2\text{GaB}_2$ , (f)  $(\text{Mo}_{2/3}\text{Y}_{1/3})_2\text{GaB}_2$ .

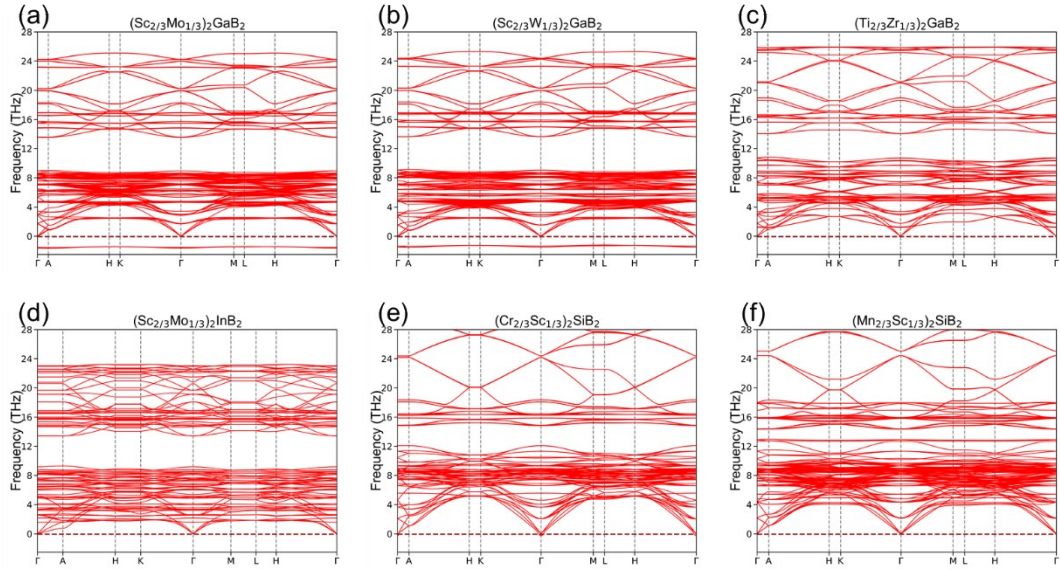

**Figure S7.** Phonon dispersion calculation for (a)  $(\text{Sc}_{2/3}\text{Mo}_{1/3})_2\text{GaB}_2$ , (b)  $(\text{Sc}_{2/3}\text{W}_{1/3})_2\text{GaB}_2$ , (c)  $(\text{Ti}_{2/3}\text{Zr}_{1/3})_2\text{GaB}_2$ , (d)  $(\text{Sc}_{2/3}\text{Mo}_{1/3})_2\text{InB}_2$ , (e)  $(\text{Cr}_{2/3}\text{Sc}_{1/3})_2\text{SiB}_2$ , (f)  $(\text{Mn}_{2/3}\text{Sc}_{1/3})_2\text{SiB}_2$ .

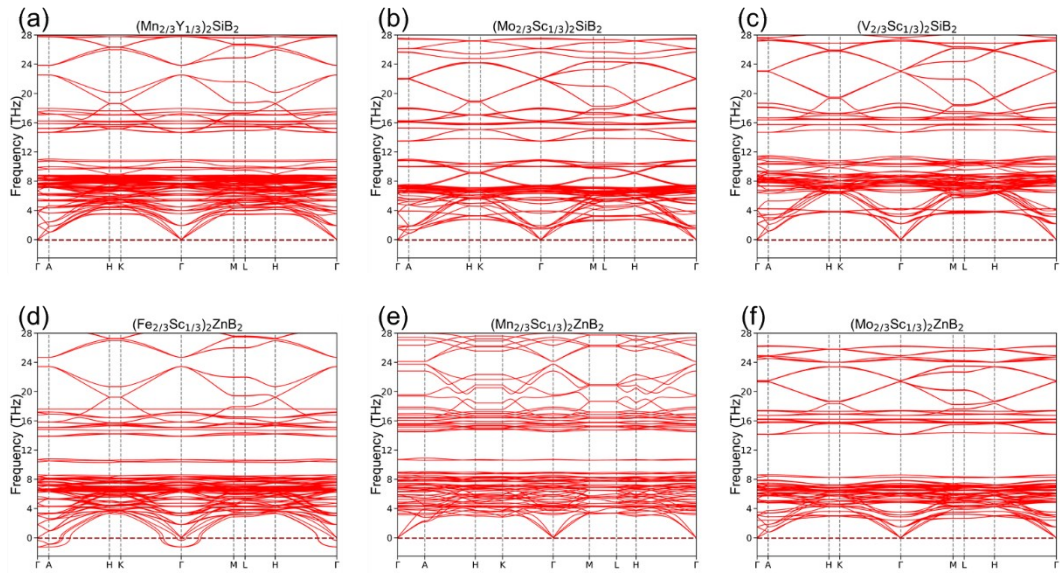

**Figure S8.** Phonon dispersion calculation for (a)  $(\text{Mn}_{2/3}\text{Y}_{1/3})_2\text{SiB}_2$ , (b)  $(\text{Mo}_{2/3}\text{Sc}_{1/3})_2\text{SiB}_2$ , (c)  $(\text{V}_{2/3}\text{Sc}_{1/3})_2\text{ZnB}_2$ , (d)  $(\text{Fe}_{2/3}\text{Sc}_{1/3})_2\text{ZnB}_2$ , (e)  $(\text{Mn}_{2/3}\text{Sc}_{1/3})_2\text{ZnB}_2$ , (f)  $(\text{Mo}_{2/3}\text{Sc}_{1/3})_2\text{SiB}_2$ .

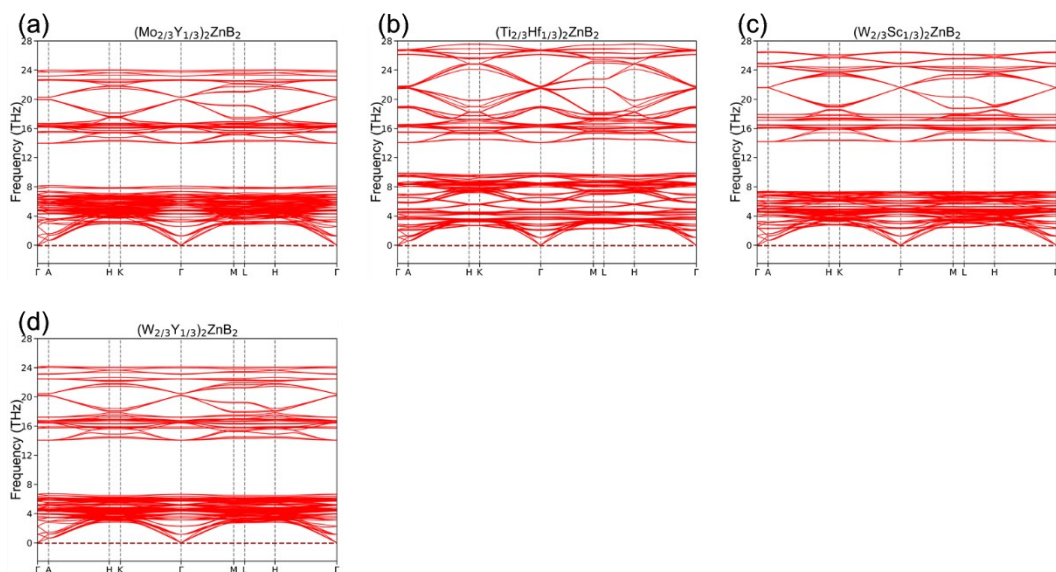

**Figure S9.** Phonon dispersion calculation for (a)  $(\text{Mo}_{2/3}\text{Y}_{1/3})_2\text{ZnB}_2$ , (b)  $(\text{Ti}_{2/3}\text{Hf}_{1/3})_2\text{ZnB}_2$ , (c)  $(\text{W}_{2/3}\text{Sc}_{1/3})_2\text{ZnB}_2$ , (d)  $(\text{W}_{2/3}\text{Y}_{1/3})_2\text{ZnB}_2$ .

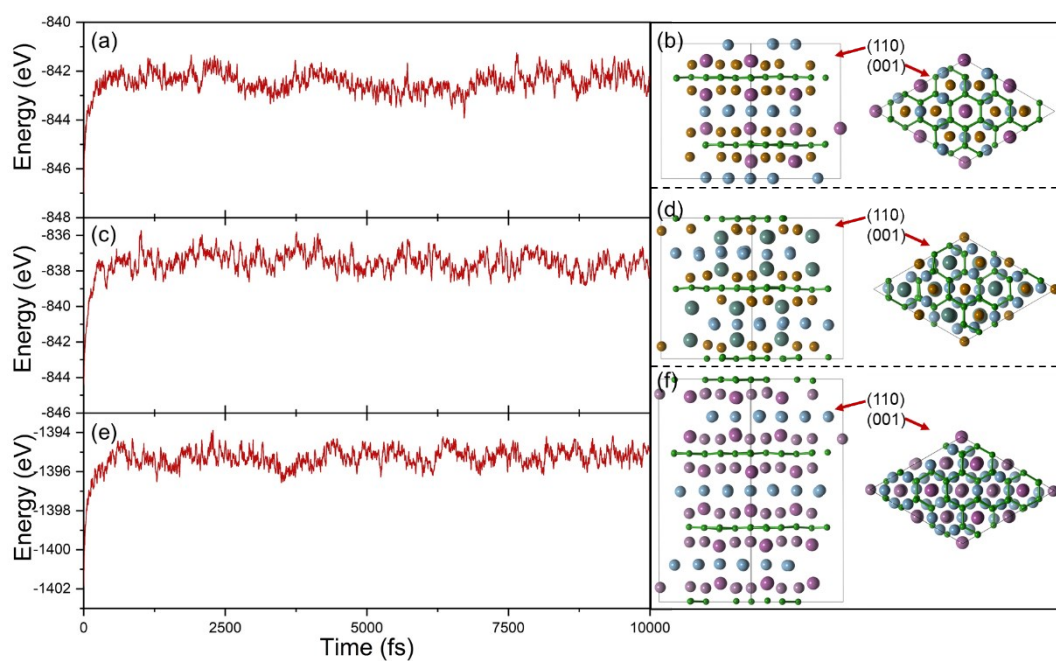

**Figure S10.** Ab initial molecular dynamics simulations at 300 K and equilibrium structures of three predicted quaternary *h*-MAB which represent three kinds of structures: (a) and (b)  $(\text{Fe}_{2/3}\text{Sc}_{1/3})_2\text{AlB}_2$  ( $P\bar{6}2m$ ); (c) and (d)  $(\text{Fe}_{2/3}\text{Y}_{1/3})_2\text{AlB}_2$  ( $P\bar{6}2c$ ); (e) and (f)  $(\text{Mo}_{2/3}\text{Sc}_{1/3})_2\text{AlB}_2$  ( $R\bar{3}m$ ).

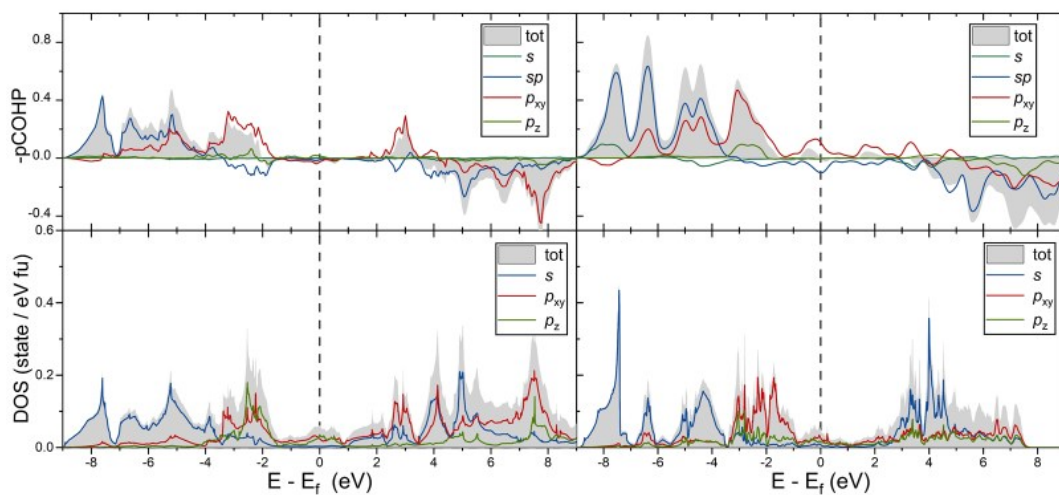

**Figure S11.** Calculated projected crystal orbital Hamilton population (pCOHP) for Al-Al in (a)  $\text{Mo}_2\text{AlB}_2$  and (b)  $(\text{Mo}_{2/3}\text{Sc}_{1/3})_2\text{AlB}_2$ ; Calculated projected density of states for element Al in (c)  $\text{Mo}_2\text{AlB}_2$  and (d)  $(\text{Mo}_{2/3}\text{Sc}_{1/3})_2\text{AlB}_2$ .

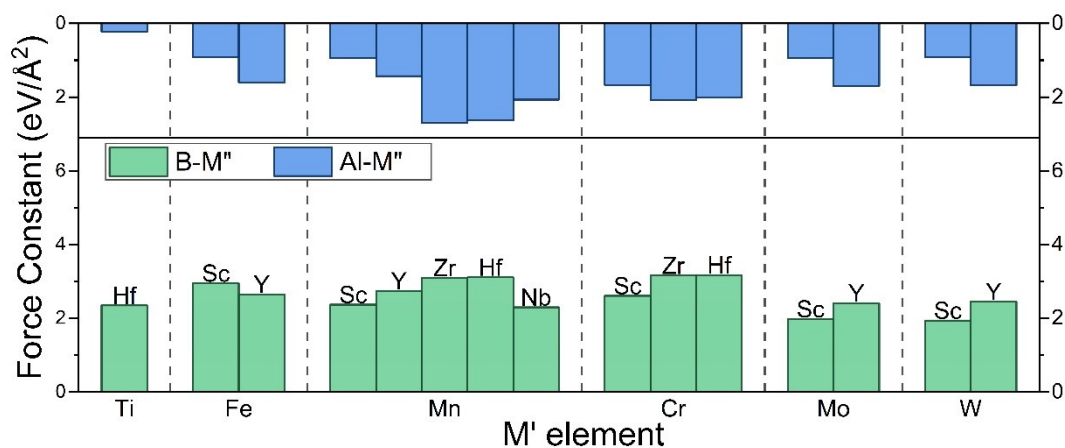

**Figure S12.** Comparison of calculated force constants for  $\text{M}''\text{-Al}$  and  $\text{M}''\text{-B}$  of the 15 predicted  $(\text{M}'_{2/3}\text{M}''_{1/3})_2\text{AlB}_2$ .

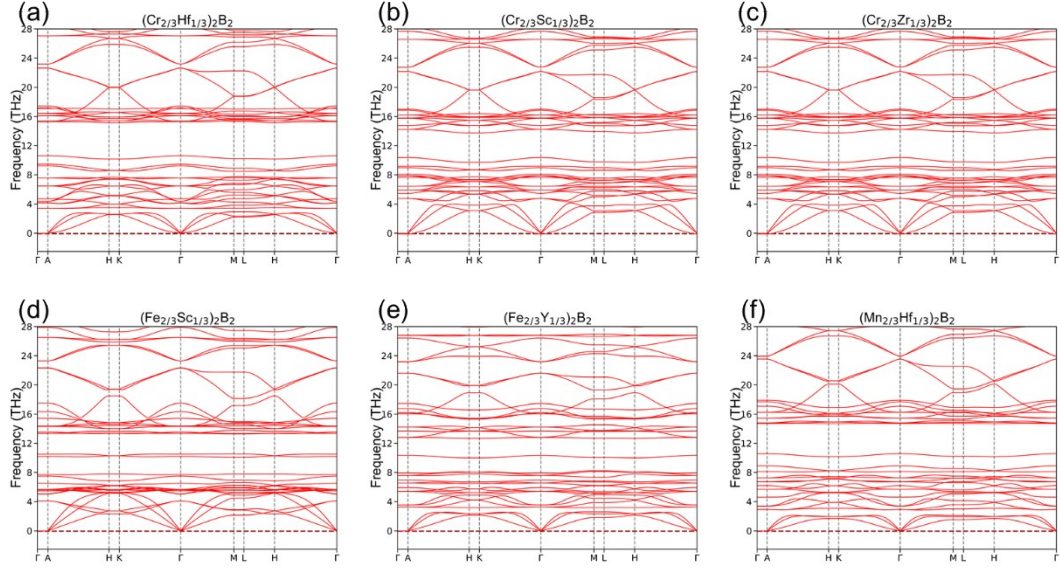

**Figure S13.** Phonon dispersion calculation for (a)  $(\text{Cr}_{2/3}\text{Hf}_{1/3})_2\text{B}_2$ , (b)  $(\text{Cr}_{2/3}\text{Sc}_{1/3})_2\text{B}_2$ , (c)  $(\text{Cr}_{2/3}\text{Zr}_{1/3})_2\text{B}_2$ , (d)  $(\text{Fe}_{2/3}\text{Sc}_{1/3})_2\text{B}_2$ , (e)  $(\text{Fe}_{2/3}\text{Y}_{1/3})_2\text{B}_2$ , (f)  $(\text{Mn}_{2/3}\text{Hf}_{1/3})_2\text{B}_2$ .

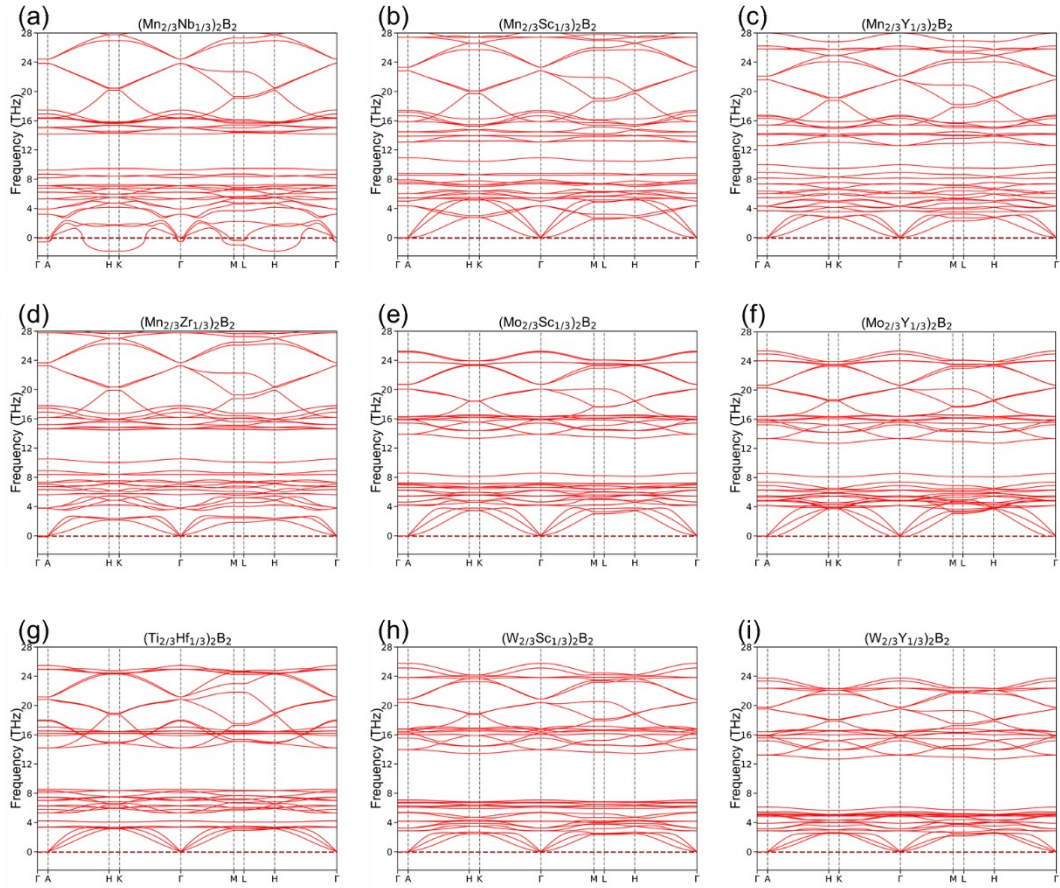

**Figure S14.** Phonon dispersion calculation for (a)  $(\text{Mn}_{2/3}\text{Nb}_{1/3})_2\text{B}_2$ , (b)  $(\text{Mn}_{2/3}\text{Sc}_{1/3})_2\text{B}_2$ , (c)  $(\text{Mn}_{2/3}\text{Y}_{1/3})_2\text{B}_2$ , (d)  $(\text{Mn}_{2/3}\text{Zr}_{1/3})_2\text{B}_2$ , (e)  $(\text{Mo}_{2/3}\text{Sc}_{1/3})_2\text{B}_2$ , (f)  $(\text{Mo}_{2/3}\text{Y}_{1/3})_2\text{B}_2$ , (g)  $(\text{Ti}_{2/3}\text{Hf}_{1/3})_2\text{B}_2$ , (h)  $(\text{W}_{2/3}\text{Sc}_{1/3})_2\text{B}_2$ , (i)  $(\text{W}_{2/3}\text{Y}_{1/3})_2\text{B}_2$ .

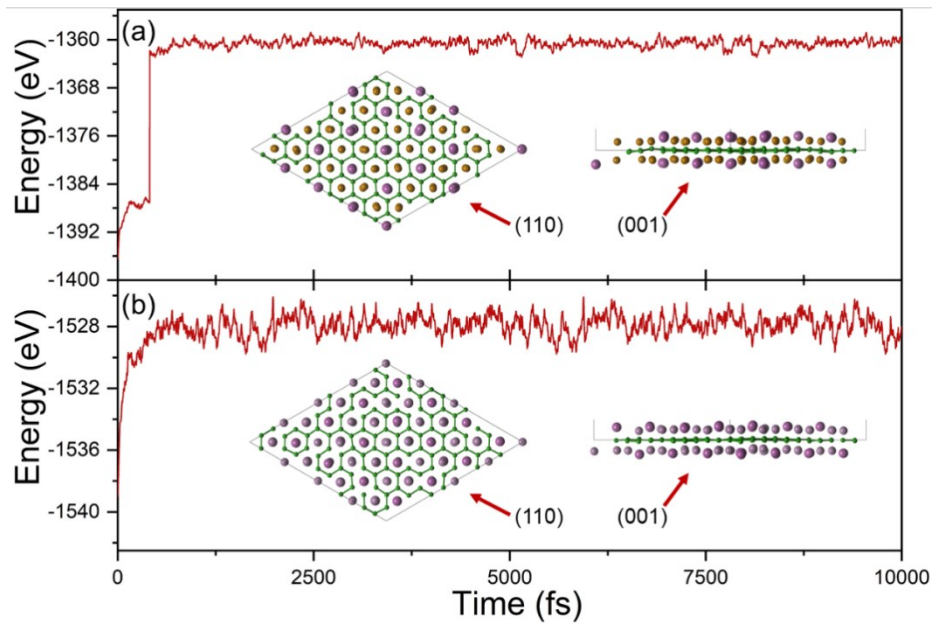

**Figure S15.** Ab initial molecular dynamics simulations at 300 K and equilibrium structures of two predicted quaternary *h*-MBenes which represent two kinds of structures: (a)  $(\text{Fe}_{2/3}\text{Sc}_{1/3})_2\text{B}_2$  ( $P6/mmm$ ); (b)  $(\text{Mo}_{2/3}\text{Sc}_{1/3})_2\text{B}_2$  ( $P\bar{3}m1$ ).

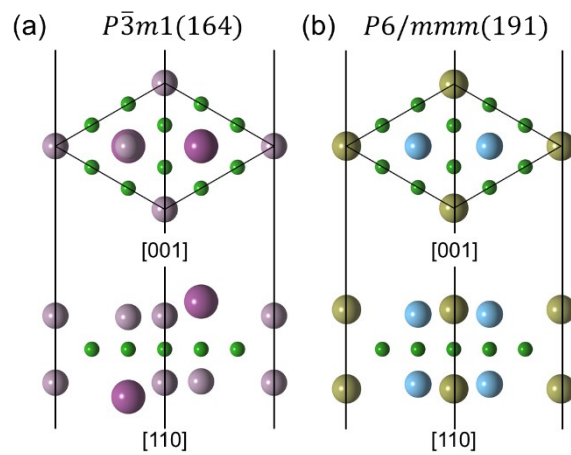

**Figure S16.** Top and side view of two kinds structure of *h*-MBenes: (a)  $P\bar{3}m1(164)$ ; (b)  $P6/mmm(191)$ .



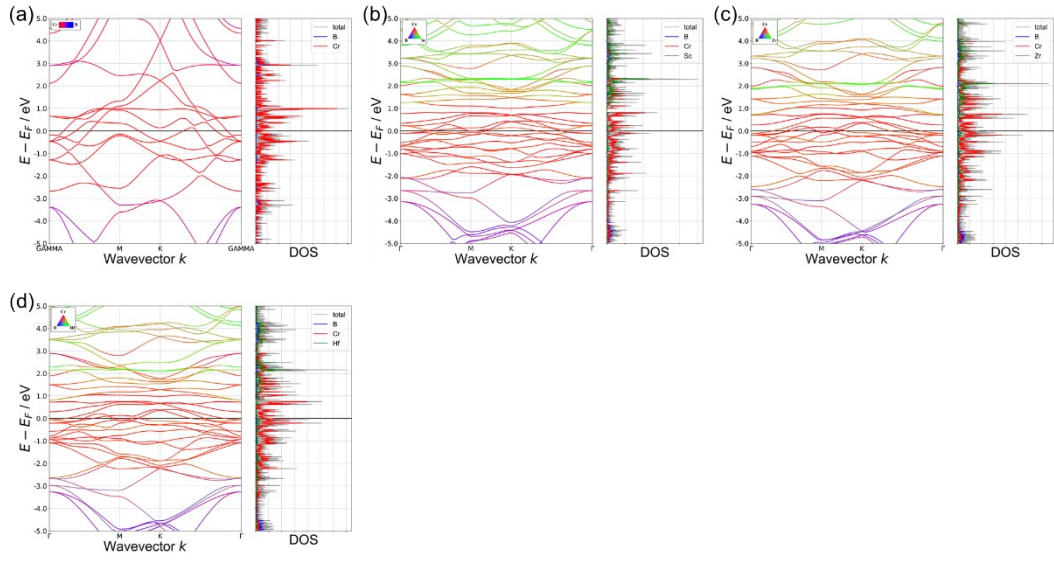

**Figure S17.** Calculated band structure and projected DOS for (a)  $\text{Cr}_2\text{B}_2$ , (b)  $(\text{Cr}_{2/3}\text{Sc}_{1/3})_2\text{B}_2$ , (c)  $(\text{Cr}_{2/3}\text{Zr}_{1/3})_2\text{B}_2$ , (d)  $(\text{Cr}_{2/3}\text{Hf}_{1/3})_2\text{B}_2$ .

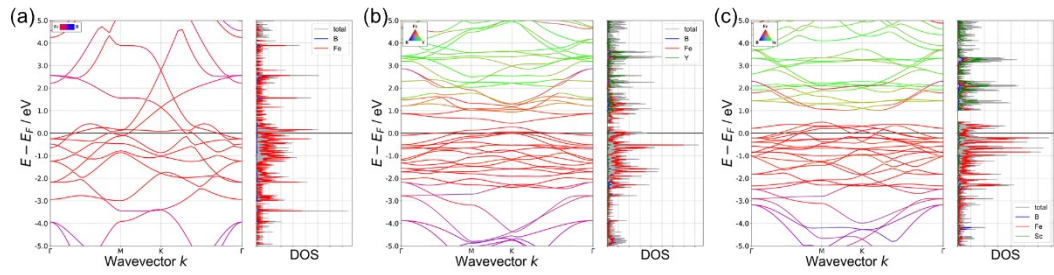

**Figure S18.** Calculated band structure and projected DOS for (a)  $\text{Fe}_2\text{B}_2$ , (b)  $(\text{Fe}_{2/3}\text{Sc}_{1/3})_2\text{B}_2$ , (c)  $(\text{Fe}_{2/3}\text{Y}_{1/3})_2\text{B}_2$ .

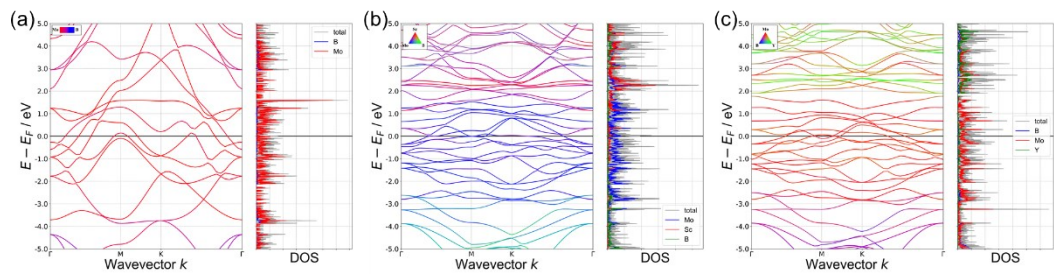

**Figure S19.** Calculated band structure and projected DOS for (a)  $\text{Mo}_2\text{B}_2$ , (b)  $(\text{Mo}_{2/3}\text{Sc}_{1/3})_2\text{B}_2$ , (c)  $(\text{Mo}_{2/3}\text{Y}_{1/3})_2\text{B}_2$ .

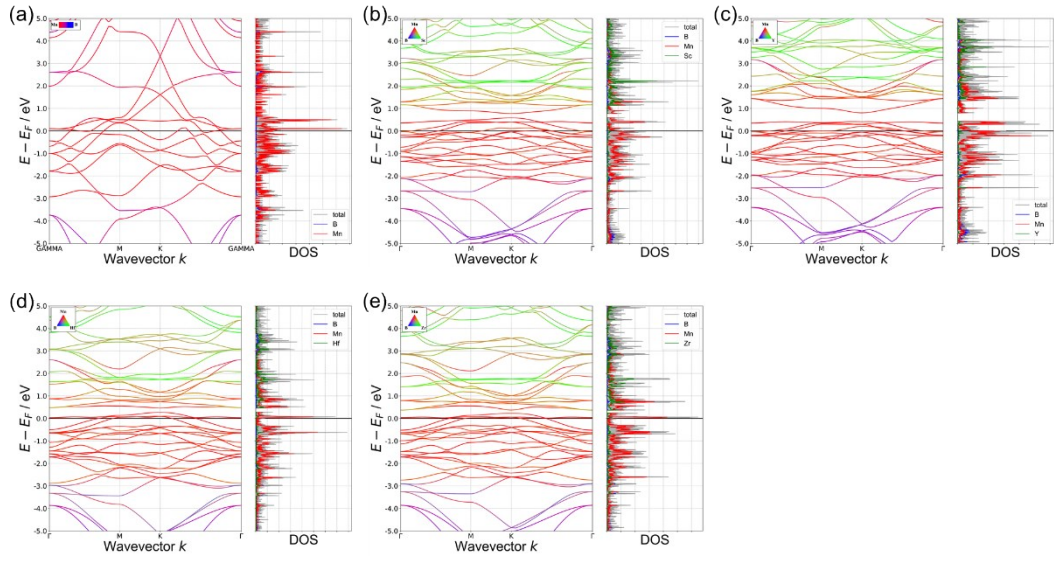

**Figure S20.** Calculated band structure and projected DOS for (a)  $\text{Mn}_2\text{B}_2$ , (b)  $(\text{Mn}_{2/3}\text{Sc}_{1/3})_2\text{B}_2$ , (c)  $(\text{Mn}_{2/3}\text{Y}_{1/3})_2\text{B}_2$ , (d)  $(\text{Mn}_{2/3}\text{Hf}_{1/3})_2\text{B}_2$ , (e)  $(\text{Mn}_{2/3}\text{Zr}_{1/3})_2\text{B}_2$ .

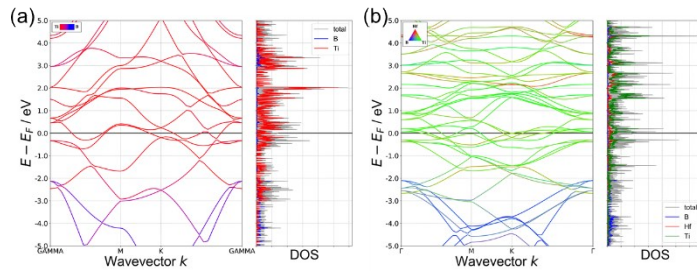

**Figure S21.** Calculated band structure and projected DOS for (a)  $\text{Ti}_2\text{B}_2$ , (b)  $(\text{Ti}_{2/3}\text{Hf}_{1/3})_2\text{B}_2$ .

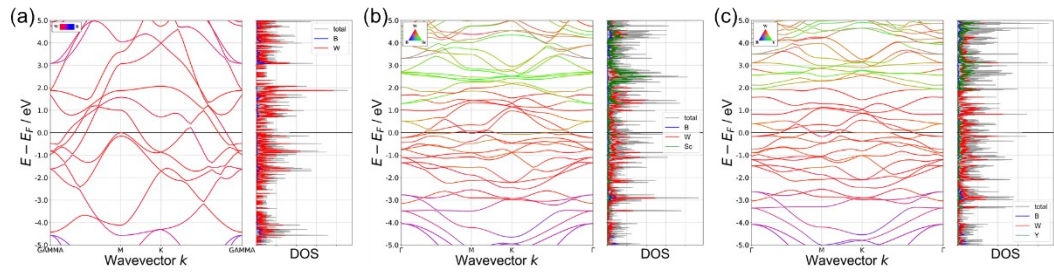

**Figure S22.** Calculated band structure and projected DOS for (a)  $\text{W}_2\text{B}_2$ , (b)  $(\text{W}_{2/3}\text{Sc}_{1/3})_2\text{B}_2$ , (c)  $(\text{W}_{2/3}\text{Y}_{1/3})_2\text{B}_2$ .

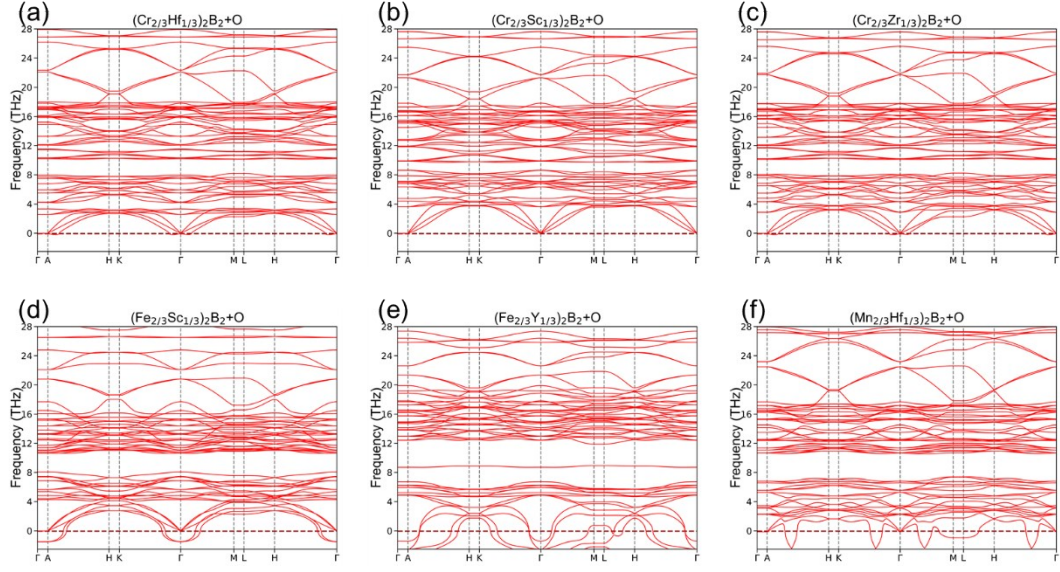

**Figure S23.** Phonon dispersion calculation for (a)  $(\text{Cr}_{2/3}\text{Hf}_{1/3})_2\text{B}_2\text{O}_2$ , (b)  $(\text{Cr}_{2/3}\text{Sc}_{1/3})_2\text{B}_2\text{O}_2$ , (c)  $(\text{Cr}_{2/3}\text{Zr}_{1/3})_2\text{B}_2\text{O}_2$ , (d)  $(\text{Fe}_{2/3}\text{Sc}_{1/3})_2\text{B}_2\text{O}_2$ , (e)  $(\text{Fe}_{2/3}\text{Y}_{1/3})_2\text{B}_2\text{O}_2$ , (f)  $(\text{Mn}_{2/3}\text{Hf}_{1/3})_2\text{B}_2\text{O}_2$ .

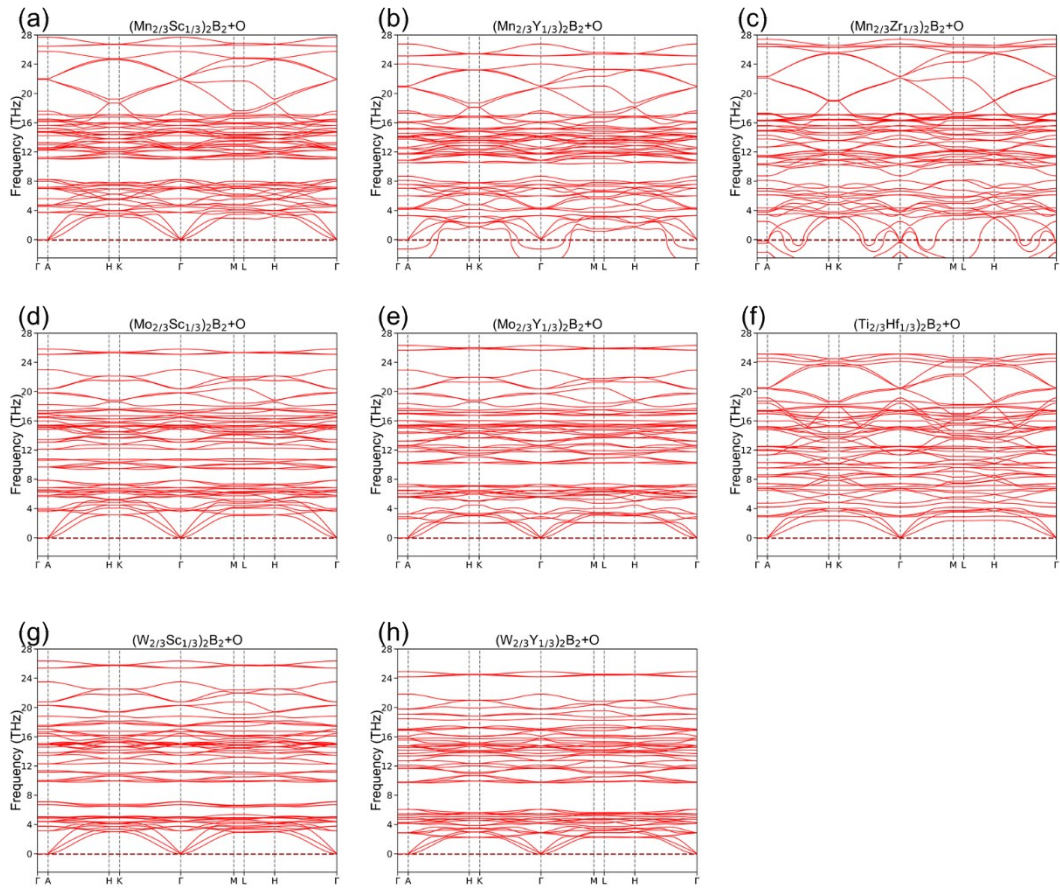

**Figure S24.** Phonon dispersion calculation for (a)  $(\text{Mn}_{2/3}\text{Sc}_{1/3})_2\text{B}_2\text{O}_2$ , (b)  $(\text{Mn}_{2/3}\text{Y}_{1/3})_2\text{B}_2\text{O}_2$ , (c)  $(\text{Mn}_{2/3}\text{Zr}_{1/3})_2\text{B}_2\text{O}_2$ , (d)  $(\text{Mo}_{2/3}\text{Sc}_{1/3})_2\text{B}_2\text{O}_2$ , (e)  $(\text{Mo}_{2/3}\text{Y}_{1/3})_2\text{B}_2\text{O}_2$ , (f)  $(\text{Ti}_{2/3}\text{Hf}_{1/3})_2\text{B}_2\text{O}_2$ , (g)  $(\text{W}_{2/3}\text{Sc}_{1/3})_2\text{B}_2\text{O}_2$ , (h)  $(\text{W}_{2/3}\text{Y}_{1/3})_2\text{B}_2\text{O}_2$ .

## Supporting Tables

**Table S1.** Symmetry information and identified equilibrium simplex for  $(M'_{2/3}M''_{1/3})_2AB_2$  composition.

| A  | M' | M'' | Symmetry           | Competing Phase                                                                                                         |
|----|----|-----|--------------------|-------------------------------------------------------------------------------------------------------------------------|
| Al | W  | Y   | $R\bar{3}m$ (166)  | AlBW, Al <sub>5</sub> W, BW <sub>2</sub> , YB <sub>2</sub>                                                              |
| Al | Fe | Y   | $P\bar{6}2c$ (190) | Al(FeB) <sub>2</sub> , YB <sub>2</sub> , Y <sub>2</sub> Al, YAl <sub>2</sub>                                            |
| Al | Fe | Sc  | $P\bar{6}2m$ (189) | Al(FeB) <sub>2</sub> , ScB <sub>2</sub> , ScAl                                                                          |
| Al | Mn | Sc  | $C2$ (5)           | Mn <sub>2</sub> AlB <sub>2</sub> , ScB <sub>2</sub> , ScAl                                                              |
| Al | Mn | Y   | $P\bar{6}2c$ (190) | Mn <sub>2</sub> AlB <sub>2</sub> , YB <sub>2</sub> , Y <sub>2</sub> Al, YAl <sub>2</sub>                                |
| Al | Mn | Zr  | $R\bar{3}m$ (166)  | Mn <sub>2</sub> AlB <sub>2</sub> , ZrB <sub>2</sub> , Zr <sub>4</sub> Al <sub>3</sub> , Zr <sub>2</sub> Al <sub>3</sub> |
| Al | Mn | Hf  | $R\bar{3}m$ (166)  | Mn <sub>2</sub> AlB <sub>2</sub> , HfB <sub>2</sub> , HfAl <sub>2</sub> , Hf <sub>4</sub> Al <sub>3</sub>               |
| Al | Mo | Y   | $R\bar{3}m$ (166)  | BMo, AlBMo, YB <sub>2</sub> , YAl <sub>2</sub>                                                                          |
| Al | W  | Sc  | $R\bar{3}m$ (166)  | AlBW, Al <sub>5</sub> W, BW <sub>2</sub> , ScB <sub>2</sub>                                                             |
| Al | Mo | Sc  | $R\bar{3}m$ (166)  | BMo, AlMo <sub>3</sub> , Al <sub>8</sub> Mo <sub>3</sub> , ScB <sub>2</sub>                                             |
| Al | Cr | Sc  | $R\bar{3}m$ (166)  | CrB, ScB <sub>2</sub> , ScAl <sub>3</sub>                                                                               |
| Al | Ti | Hf  | $P\bar{6}2m$ (189) | TiB <sub>2</sub> , Ti <sub>3</sub> Al, HfAl <sub>2</sub> , Hf <sub>4</sub> Al <sub>3</sub>                              |
| Al | Mn | Nb  | $R\bar{3}m$ (166)  | Mn <sub>2</sub> AlB <sub>2</sub> , NbAl <sub>3</sub> , Nb <sub>5</sub> B <sub>6</sub>                                   |
| Al | Cr | Zr  | $R\bar{3}m$ (166)  | CrB, ZrB <sub>2</sub> , ZrAl <sub>3</sub>                                                                               |
| Al | Cr | Hf  | $R\bar{3}m$ (166)  | Al(CrB) <sub>2</sub> , AlCr <sub>2</sub> , HfB <sub>2</sub> , HfAl <sub>3</sub>                                         |
| Ga | Ti | Zr  | $P\bar{6}2m$ (189) | TiB <sub>2</sub> , Ti <sub>3</sub> B <sub>4</sub> , Zr <sub>2</sub> Al <sub>3</sub>                                     |
| Ga | Mn | Y   | $P\bar{6}2c$ (190) | MnB <sub>4</sub> , MnB, MnGa <sub>4</sub> , YB <sub>2</sub> , YGa                                                       |
| Ga | Mn | Sc  | $P\bar{6}2c$ (190) | MnB <sub>4</sub> , MnB, MnGa <sub>4</sub> , ScB <sub>2</sub> , ScGa                                                     |
| Ga | Mo | Y   | $C2$ (5)           | BMo, YB <sub>4</sub> , YGa <sub>2</sub>                                                                                 |
| Ga | Fe | Sc  | $P\bar{6}2m$ (189) | FeB, ScB <sub>2</sub> , Ga <sub>3</sub> Fe                                                                              |
| Ga | Sc | W   | $C2$ (5)           | ScB <sub>2</sub> , BW <sub>2</sub> , Sc <sub>3</sub> Ga <sub>5</sub>                                                    |
| Ga | Mn | Zr  | $R\bar{3}m$ (166)  | ZrB <sub>2</sub> , Mn <sub>2</sub> B, MnGa <sub>4</sub> , MnB <sub>4</sub>                                              |
| Ga | Mn | Hf  | $P\bar{6}2c$ (190) | MnGa <sub>4</sub> , Mn <sub>2</sub> B, HfB <sub>2</sub>                                                                 |
| Ga | Sc | Mo  | $C2$ (5)           | BMo, ScB <sub>2</sub> , Sc <sub>3</sub> G <sub>5</sub> , ScGa <sub>3</sub>                                              |
| Ga | Mo | Sc  | $R\bar{3}m$ (166)  | BMo, ScB <sub>2</sub> , ScGa <sub>3</sub>                                                                               |
| Ga | Mn | Nb  | $R\bar{3}m$ (166)  | NbB <sub>2</sub> , MnB, Mn <sub>2</sub> B, MnGa <sub>4</sub>                                                            |
| Ga | Cr | Sc  | $R\bar{3}m$ (166)  | ScB <sub>2</sub> , CrB, ScGa <sub>3</sub>                                                                               |
| Zn | Mo | Sc  | $R\bar{3}m$ (166)  | BMo, ScB <sub>2</sub> , ScZn <sub>3</sub>                                                                               |
| Zn | Mo | Y   | $R\bar{3}m$ (166)  | BMo, YZn <sub>3</sub> , YB <sub>2</sub>                                                                                 |
| Zn | Mn | Sc  | $C2$ (5)           | MnB, ScB <sub>2</sub> , ScZn <sub>3</sub>                                                                               |
| Zn | Ti | Hf  | $P\bar{6}2m$ (189) | HfZn <sub>2</sub> , TiB <sub>2</sub> , Hf <sub>2</sub> Zn, Ti <sub>3</sub> B <sub>4</sub>                               |
| Zn | Fe | Sc  | $P\bar{6}2m$ (189) | ScB <sub>2</sub> , ScZn <sub>3</sub> , FeB                                                                              |
| Zn | W  | Sc  | $R\bar{3}m$ (166)  | BW <sub>2</sub> , ScZn <sub>12</sub> , ScB <sub>2</sub> , BW                                                            |
| Zn | W  | Y   | $R\bar{3}m$ (166)  | YZn <sub>3</sub> , YB <sub>2</sub> , BW                                                                                 |
| Si | Mn | Sc  | $R\bar{3}m$ (166)  | ScB <sub>2</sub> , Mn <sub>4</sub> Si <sub>7</sub> , MnB                                                                |
| Si | Mo | Y   | $R\bar{3}m$ (166)  | YB <sub>4</sub> , Bmo, YSi, Si <sub>2</sub> Mo,                                                                         |
| Si | Cr | Sc  | $R\bar{3}m$ (166)  | ScB <sub>2</sub> , CrSi <sub>2</sub> , CrB,                                                                             |
| Si | V  | Sc  | $R\bar{3}m$ (166)  | ScSi, ScB <sub>2</sub> , VSi <sub>2</sub> , V <sub>2</sub> B <sub>3</sub> ,                                             |
| Si | Mn | Y   | $P\bar{6}2c$ (190) | MnB, Mn <sub>5</sub> Si <sub>7</sub> , YB <sub>4</sub> , YSi,                                                           |
| In | Sc | Mo  | $C2$ (5)           | ScIn <sub>2</sub> , BMo, ScIn, ScB <sub>2</sub>                                                                         |

**Table S2.** ICOHP, Force Constant and Bader Charge in  $\text{Mo}_2\text{AlB}_2$ ,  $(\text{Mo}_{2/3}\text{Sc}_{1/3})_2\text{AlB}_2$  and  $(\text{Mo}_{2/3}\text{Y}_{1/3})_2\text{AlB}_2$ .

|                        |                                           | $\text{Mo}_2\text{AlB}_2$ | $(\text{Mo}_{2/3}\text{Sc}_{1/3})_2\text{AlB}_2$ | $(\text{Mo}_{2/3}\text{Y}_{1/3})_2\text{AlB}_2$ |
|------------------------|-------------------------------------------|---------------------------|--------------------------------------------------|-------------------------------------------------|
| -ICOHP<br>(eV/bond)    | A-A                                       | 1.20                      | 2.60                                             | 2.40                                            |
|                        | B-B                                       | 5.75                      | 5.54                                             | 5.38                                            |
|                        | M-A                                       | 1.76                      | 1.67(Mo)<br>0.64(Sc)                             | 1.38(Mo)<br>1.00(Y)                             |
|                        | M-B                                       | 1.76                      | 1.99(Mo)<br>0.91(Sc)                             | 1.97(Mo)<br>1.29(Y)                             |
|                        | Force<br>Constant<br>(eV/Å <sup>2</sup> ) | A-A                       | 0.44                                             | 4.35                                            |
|                        | B-B                                       | 6.76                      | 7.10                                             | 6.64                                            |
|                        | M-A                                       | 2.39                      | 1.91(Mo)<br>1.64(Sc)                             | 1.79(Mo)<br>1.71(Y)                             |
|                        | M-B                                       | 3.92                      | 5.01(Mo)<br>2.37(Sc)                             | 5.47(Mo)<br>2.41(Y)                             |
| Bader<br>Charge<br>(e) | A                                         | 2.34 (-0.66)              | 3.02 (0.02)                                      | 3.10 (0.10)                                     |
|                        | B                                         | 3.50 (0.50)               | 3.59 (0.59)                                      | 3.57 (0.57)                                     |
|                        | M                                         | 13.83 (-0.17)             | 13.90(Mo) (-0.16)<br>9.53(Sc) (-1.48)            | 13.81(Mo) (-0.19)<br>9.50(Y) (-1.50)            |

**Table S3.** The absolute values of the separation energies of each quaternary *h*-MAB phases.

|                                                  | M/B (J/m <sup>2</sup> ) | M/A (J/m <sup>2</sup> ) |
|--------------------------------------------------|-------------------------|-------------------------|
| $(\text{Fe}_{2/3}\text{Y}_{1/3})_2\text{AlB}_2$  | 6.79                    | 2.15                    |
| $(\text{Fe}_{2/3}\text{Sc}_{1/3})_2\text{AlB}_2$ | 5.69                    | 2.15                    |
| $(\text{Cr}_{2/3}\text{Zr}_{1/3})_2\text{AlB}_2$ | 7.07                    | 3.16                    |
| $(\text{Cr}_{2/3}\text{Hf}_{1/3})_2\text{AlB}_2$ | 7.12                    | 3.25                    |
| $(\text{W}_{2/3}\text{Sc}_{1/3})_2\text{AlB}_2$  | 6.42                    | 2.96                    |
| $(\text{Mn}_{2/3}\text{Y}_{1/3})_2\text{AlB}_2$  | 7.76                    | 3.60                    |
| $(\text{Cr}_{2/3}\text{Sc}_{1/3})_2\text{AlB}_2$ | 7.71                    | 3.59                    |
| $(\text{Mn}_{2/3}\text{Sc}_{1/3})_2\text{AlB}_2$ | 7.65                    | 3.61                    |
| $(\text{Mo}_{2/3}\text{Y}_{1/3})_2\text{AlB}_2$  | 7.18                    | 3.42                    |
| $(\text{Mn}_{2/3}\text{Hf}_{1/3})_2\text{AlB}_2$ | 7.16                    | 3.42                    |
| $(\text{W}_{2/3}\text{Y}_{1/3})_2\text{AlB}_2$   | 6.91                    | 3.33                    |
| $(\text{Ti}_{2/3}\text{Hf}_{1/3})_2\text{AlB}_2$ | 6.92                    | 3.39                    |
| $(\text{Mo}_{2/3}\text{Sc}_{1/3})_2\text{AlB}_2$ | 7.07                    | 3.52                    |
| $(\text{Mn}_{2/3}\text{Zr}_{1/3})_2\text{AlB}_2$ | 7.71                    | 3.87                    |
| $(\text{Mn}_{2/3}\text{Nb}_{1/3})_2\text{AlB}_2$ | 7.74                    | 4.67                    |
